# Supplementary material for: Chemical analysis and angiotensin I-converting enzyme inhibitory activity of enzymatic hydrolysates derived from meat of goat-kids with supplemental selenium
Source: PeerJ. 2025 Apr 22;13:e19261. doi: 10.7717/peerj.19261 (PMC12024437; doi:10.7717/peerj.19261)
Supplement: Supplemental Information 2 [file peerj-13-19261-s002.xls]

## Sheet: Hoja1
treatment	time	repetition	mousture	protein	fat	ash
control	7	1	76.699	15.3841	2.25213	1.08612
control	7	2	77.3006	14.5145	2.20854	1.08789
control	14	1	75	15.798	3.136	1.05764
control	14	2	79.1829	15.3465	3.1298	1.06607
control	21	1	78.0488	14.1605	2.62129	0.970735
control	21	2	80.3468	14.3574	2.55233	0.987855
selenome	7	1	77.4194	16.8408	1.76666	1.09324
selenome	7	2	78.7273	16.1319	1.77277	1.1025
selenome	14	1	77.2176	16.8943	2.46987	1.09324
selenome	14	2	76.293	16.6623	2.50267	1.08517
selenome	21	1	68.0569	19.1483	3.61997	1.24078
selenome	21	2	76.8953	19.7147	3.74031	1.25655
selenito	7	1	77.4317	14.9961	2.45346	1.05011
selenito	7	2	77.3973	15.2528	2.34257	1.0664
selenito	14	1	76.9231	15.9603	3.82084	1.04956
selenito	14	2	75.8865	16.2614	3.73809	1.06587
selenito	21	1	76.7677	15.4841	3.54382	1.00984
selenito	21	2	77.7174	15.889	3.36156	1.0019
