# Supplementary material for: Chemical analysis and angiotensin I-converting enzyme inhibitory activity of enzymatic hydrolysates derived from meat of goat-kids with supplemental selenium
Source: PeerJ. 2025 Apr 22;13:e19261. doi: 10.7717/peerj.19261 (PMC12024437; doi:10.7717/peerj.19261)
Supplement: Supplemental Information 3 [file peerj-13-19261-s003.xls]

## Sheet: Antes de hidrólisis
														MW	Log PM	Rf		Línea 1 Rf	Interpolación	PM		Línea 5 Rf	Interpolación	PM		Línea 8 Rf	Interpolación	PM
														200	2.3	0.093		0.051	2.32197	282		0.038	2.33569	213.79		0.041	2.33252	213.79
														150	2.17	0.178		0.118	2.25129	177.82		0.103	2.26712	181.97		0.095	2.27556	186.2
														100	2	0.328		0.153	2.21437	162.18		0.172	2.19432	154.88		0.458	1.8926	77.62
														75	1.87	0.48		0.192	2.17323	147.91		0.253	2.10887	125.89		0.476	1.87362	74.13
														50	1.69	0.684		0.264	2.09727	123		0.437	1.91476	81.28		0.649	1.69111	48.97
														32	1.5	0.828		0.351	2.00549	100		0.499	1.84935	69.18		0.723	1.61304	40.73
														25	1.39	0.949		0.442	1.90948	79.43		0.669	1.67001	46.77
														20	1.3	0.999		0.492	1.85674	70.79		0.721	1.61515	40.73
																		0.544	1.80188	63
																		0.62	1.7217	52.48
																		0.688	1.64996	43.65
																		0.841	1.48855	30.19
																		0.948	1.37567	23.44
																		Línea 2 Rf	Interpolación	PM		Línea 6 Rf	Interpolación	PM		Línea 9 Rf	Interpolación	PM
																		0.037	2.33674	213.79		0.045	2.3283	208.92		0.049	2.32408	208.92
																		0.456	1.89471	77.62		0.12	2.24918	173.78		0.14	2.22808	165.95
																		0.534	1.81243	64.56		0.353	2.00338	100		0.174	2.19221	154.88
																						0.424	1.92847	83.17		0.254	2.10782	125.89
																		Linea 3 Rf	Interpolación			0.491	1.85779	70.79		0.366	1.98966	95.49
																		0.061	2.31143	204.17		0.67	1.66895	45.7		0.438	1.9137	81.28
																		0.096	2.2745	186.2		0.706	1.63097	42.65		0.475	1.87467	74.13
																		0.431	1.92109	83.17						0.507	1.84091	69.18
																		0.498	1.85041	70.79						0.638	1.70271	50.11
																		0.659	1.68056	47.86						0.763	1.57084	37.15
																		0.722	1.61409	40.73
																		Línea 4 Rf	Interpolación			Línea 7	Interpolación	PM		Línea 10	Interpolación	PM
																		0.033	2.34096	218.77		0.044	2.32936	213.3		0.14	2.22808	165.95
																		0.096	2.2745	186.2		0.118	2.25129	178.23		0.174	2.19221	154.88
																		0.19	2.17533	147.91		0.17	2.19643	157.03		0.254	2.10782	125.89
																		0.271	2.08988	120.22		0.245	2.11731	128.82		0.366	1.98966	77.62
																		0.417	1.93586	85.11		0.375	1.98017	95.49		0.438	1.9137	81.28
																		0.499	1.84935	69.18		0.421	1.93164	85.11		0.475	1.87467	74.13
																		0.671	1.6679	45.7		0.503	1.84513	69.18		0.507	1.84091	69.18
																		0.749	1.58561	38		0.668	1.67106	46.77		0.638	1.70271	50.11
																						0.753	1.58139	38.01		0.763	1.57084	37.15

## Sheet: Despues de hidrólisis
											MW	Log PM	Rf		Line 1 Rf	Interpolation	PM		Line 5 Rf	Interpolation	PM		Line 9 Rf	Interpolation	PM
											200	2.3	0.093		0.147	2.2207	165.95		0.125	2.24391	173.78		0.097	2.27345	186.2
											150	2.17	0.178		0.196	2.16901	144.54		0.179	2.18694	151.35		0.166	2.20065	158.48
											100	2	0.328	2.252	0.311	2.04768	109.64		0.204	2.16057	144.46		0.229	2.13419	134.89
											75	1.87	0.48	0.9479	0.465	1.88522	78.85		0.24	2.12259	132.47		0.276	2.08461	120.22
											50	1.69	0.684		0.637	1.70377	50.11		0.281	2.07933	117.48		0.365	1.99072	97.72
											32	1.5	0.828		0.828	1.50227	31.62		0.325	2.03291	107.15		0.449	1.9021	79.43
											25	1.39	0.949						0.406	1.94746	87.09
											20	1.3	0.999						0.502	1.84619	69.18
															Line 2 Rf	Interpolation	PM		0.701	1.63625	42.65
															0.149	2.21859	162.18		0.888	1.43897	26.91
															0.224	2.13947	134.89
															0.36	1.99599	97.72		Line 6 Rf	Interpolation	PM
															0.491	1.85779	70.79		0.109	2.26079	181.97
															0.952	1.37145	23.44		0.154	2.21331	162.18
																			0.196	2.16901	144.54
															Line 3 Rf	Interpolation	PM		0.328	2.02975	104.71
															0.202	2.16268	144.45		0.407	1.94641	87.09
															0.255	2.10676	123.89		0.487	1.86201	72.44
															0.319	2.03924	107.15		0.933	1.3915	24.54
															0.366	1.98966	95.49
															0.509	1.8388	67.6		Line 7 Rf	Interpolation	PM
															0.878	1.44952	27.54		0.131	2.23758	169.82
																			0.194	2.17112	147.91
																			0.26	2.10149	125.89
															Line 4 Rf	Interpolation	PM		0.313	2.04557	109.64
															0.14	2.22808	165.95		0.353	2.00338	100
															0.228	2.13525	134.89		0.476	1.87362	74.13
															0.251	2.11098	128.82		0.938	1.38622	23.98
															0.288	2.07195	117.48
															0.36	1.99599	97.72		Line 8 Rf	Interpolation	PM
															0.405	1.94852	87.09		0.145	2.22281	165.95
															0.466	1.88416	75.85		0.193	2.17217	147.91
															0.504	1.84408	75.8		0.25	2.11204	128.82
															0.889	1.43792	26.91		0.304	2.05507	112.2
																			0.385	1.96962	91.2
																			0.474	1.87573	74.13
																			0.923	1.40205	27.5
