# Supplementary material for: Chemical analysis and angiotensin I-converting enzyme inhibitory activity of enzymatic hydrolysates derived from meat of goat-kids with supplemental selenium
Source: PeerJ. 2025 Apr 22;13:e19261. doi: 10.7717/peerj.19261 (PMC12024437; doi:10.7717/peerj.19261)
Supplement: Supplemental Information 4 [file peerj-13-19261-s004.xls]

## Sheet: Hoja1
treatment	time	repetition	hydrolisis level
control	7	1	9.84
control	7	2	9.77
control	14	1	12.24
control	14	2	12.2
control	21	1	9.64
control	21	2	9.67
selenome	7	1	9.31
selenome	7	2	9.44
selenome	14	1	10.33
selenome	14	2	10.36
selenome	21	1	10.13
selenome	21	2	10.07
selenito	7	1	10.1
selenito	7	2	10.03
selenito	14	1	10.53
selenito	14	2	10.69
selenito	21	1	10.92
selenito	21	2	10.99
