# Supplementary material for: Chemical analysis and angiotensin I-converting enzyme inhibitory activity of enzymatic hydrolysates derived from meat of goat-kids with supplemental selenium
Source: PeerJ. 2025 Apr 22;13:e19261. doi: 10.7717/peerj.19261 (PMC12024437; doi:10.7717/peerj.19261)
Supplement: Supplemental Information 5 [file peerj-13-19261-s005.xls]

## Sheet: Hoja1
Treatment	time	repetition	Protein	Fat	moisture	collagen
control	7	1	24	4.38	64.67	1.7
control	7	2	24.26	4.36	64.45	1.45
control	7	3	24.48	4.41	64.04	1.41
control	14	1	22.93	4.67	65.62	1.44
control	14	2	23.04	4.52	65.59	1.52
control	14	3	22.76	4.64	65.92	1.46
control	21	1	19.72	2.76	66.29	1.83
control	21	2	19.68	2.71	66.47	2.3
control	21	3	19.68	2.65	66.5	1.69
selenome	7	1	22.01	4.13	65.91	1.92
selenome	7	2	22.11	3.96	65.9	1.78
selenome	7	3	22.11	3.99	65.61	2
selenome	14	1	21.61	2.63	67.03	2
selenome	14	2	21.57	2.7	67.39	1.87
selenome	14	3	21.59	2.66	67.17	1.84
selenome	21	1	20.21	3.23	66.94	1.88
selenome	21	2	20.31	3.18	66.87	1.88
selenome	21	3	20.26	3.33	67.02	1.82
selenito	7	1	20.53	2.87	67.05	1.89
selenito	7	2	20.5	2.86	66.88	2.29
selenito	7	3	20.5	2.84	67.02	1.95
selenito	14	1	20.8	3.63	66.76	2.11
selenito	14	2	20.73	3.67	66.52	1.76
selenito	14	3	20.87	3.58	66.31	1.85
selenito	21	1	21.11	4.01	65.96	1.75
selenito	21	2	21.62	4.09	65.99	1.67
selenito	21	3	21.09	4.05	65.97	1.72
