# Supplementary material for: Chemical analysis and angiotensin I-converting enzyme inhibitory activity of enzymatic hydrolysates derived from meat of goat-kids with supplemental selenium
Source: PeerJ. 2025 Apr 22;13:e19261. doi: 10.7717/peerj.19261 (PMC12024437; doi:10.7717/peerj.19261)
Supplement: Supplemental Information 6 [file peerj-13-19261-s006.xls]

## Sheet: Inhibición ECA
treatment	time	repetition	Inhibition before hydrolisis	Inhibition after hydrolisis
control	7	1	24.7377	90.5586
control	7	2	22.0108	90.5822
control	7	3	24.2077	90.5539
control	7	4	20.2777	90.4681
control	14	1	10.3125	92.7035
control	14	2	7.618	92.9618
control	14	3	9.9372	92.8957
control	14	4	8.7923	92.8009
control	21	1	19.0789	93.4455
control	21	2	15.2559	93.6823
control	21	3	13.2056	93.5153
control	21	4	17.2115	93.6526
selenome	7	1	25.2604	92.4103
selenome	7	2	26.7857	92.395
selenome	7	3	27.0338	92.3581
selenome	7	4	23.125	92.4225
selenome	14	1	24.2077	91.9268
selenome	14	2	24.7377	91.641
selenome	14	3	23.9399	91.8572
selenome	14	4	20.5719	91.7252
selenome	21	1	22.0108	93.8269
selenome	21	2	21.1538	93.7472
selenome	21	3	27.0338	93.5529
selenome	21	4	26.5358	93.9
selenito	7	1	21.1538	91.6851
selenito	7	2	21.4416	91.4518
selenito	7	3	20.5719	91.3222
selenito	7	4	22.2924	91.5626
selenito	14	1	16.8918	92.548
selenito	14	2	11.7827	92.7871
selenito	14	3	14.9209	92.8009
selenito	14	4	15.9179	92.6208
selenito	21	1	16.8918	94.2603
selenito	21	2	16.5697	94.4913
selenito	21	3	23.6702	94.4476
selenito	21	4	22.8494	94.3309
