# Supplementary material for: Chemical analysis and angiotensin I-converting enzyme inhibitory activity of enzymatic hydrolysates derived from meat of goat-kids with supplemental selenium
Source: PeerJ. 2025 Apr 22;13:e19261. doi: 10.7717/peerj.19261 (PMC12024437; doi:10.7717/peerj.19261)
Supplement: Supplemental Information 7 [file peerj-13-19261-s007.xls]

## Sheet: Hoja1
treatment	time	repetition	Protein concentration before hydrolisis	Protein concentration after hydrolisis
control	7	1	2.237	0.1295
control	7	2	2.196	0.1237
control	7	3	2.279	0.1272
control	14	1	1.868	0.1144
control	14	2	1.876	0.116
control	14	3	1.894	0.1144
control	21	1	1.575	0.0972
control	21	2	1.564	0.0966
control	21	3	1.516	0.0956
selenome	7	1	2.5	0.1563
selenome	7	2	2.62	0.1553
selenome	7	3	2.637	0.1581
selenome	14	1	1.973	0.1217
selenome	14	2	2.001	0.1223
selenome	14	3	1.839	0.1251
selenome	21	1	1.811	0.1037
selenome	21	2	1.832	0.1025
selenome	21	3	1.852	0.1008
selenito	7	1	1.905	0.1323
selenito	7	2	1.87	0.1357
selenito	7	3	1.849	0.1295
selenito	14	1	1.85	0.1059
selenito	14	2	1.83	0.1053
selenito	14	3	1.848	0.1062
selenito	21	1	1.822	0.1136
selenito	21	2	1.815	0.1146
selenito	21	3	1.888	0.1131
